# Supplementary material
Source: PubMed Central journal article supplement (PMC3743465)
Supplement: supp_blood-2012-04-422550_blood-2012-04-422550-1.pdf [file supp_blood-2012-04-422550_blood-2012-04-422550-1.pdf]

| Subject Number | Visit | INF Days | Fiebig Stage | CD4 counts/ul | CD8 counts/ul | VL copies/ml | Age | Sex | HLA-A   | HLA-B   | Clade | CMV Specificities | Detected HIV Specificities | Non-Detected HIV Specificities |
|----------------|-------|----------|--------------|---------------|---------------|--------------|-----|-----|---------|---------|-------|-------------------|----------------------------|--------------------------------|
| AEI 001        | V1    | 25       | IV           | 357           | 4029          | 5773404      | 45  | M   | A01/A24 | B08/B18 | B     |                   | A24RW8 RYPLTFGW            | B8FL8 FLKEKGGL                 |
| AEI 002        | V1    | 29       | IV           | 370           | 930           | 1463020      | 24  | M   | A01/A24 | B07/B27 | B     | B7TM10            | A24RW8 RYPLTFGW            | B7TL10 TPGPGIRYPL              |
| AEI 002        | V3    | 61       | V            | 660           | 2770          | 293776       | 24  | M   | A01/A24 | B07/B27 | B     | B7TM10            | A24RW8                     | B7TL10                         |
| AEI 004        | V1    | 36       | IV           | 385           | 1858          | 503740       | 53  | M   | NA      | NA      | B     | B7TM10            | A2FK10 ND                  | A2SL9 ND                       |
| AEI 004        | V2    | 51       | V            | 309           | 1567          | 177454       | 53  | M   | NA      | NA      | B     | B7TM10            | A2FK10                     |                                |
| AEI 007        | L1    | 89       | V            | 267           | 728           | 120107       | 28  | M   | A02/A02 | B07/B44 | B     |                   | B7TL10 TPGPGVRYPL          | A2SL9 ND                       |
| AEI 008        | L1    | 59       | V            | 557           | 1313          | 27766        | 48  | M   | A03/A26 | B08/B27 | B     |                   | A3RK9 RLRPGGKKK            | B8FL8 ND                       |
| AEI 011        | L     | 50       | V            | 594           | 692           | 123026       | 42  | M   | A01/A01 | B08/B08 | B     |                   | B8FL8 ND                   |                                |
| AEI 013        | V1    | 32       | IV           | 460           | 3450          | 2278640      | 30  | F   | A02/A32 | B18/B35 | B     |                   | A2SL9 SLFNTVATL*           | A2FK10 FLGKIWPSYK*             |
| AEI 013        | V2    | 46       | V            | 680           | 2520          | 215942       | 30  | F   | A02/A32 | B18/B35 | B     |                   | A2SL9                      | A2FK10                         |
| AEI 013        | V3    | 59       | V            | 600           | 1460          | 349556       | 30  | F   | A02/A32 | B18/B35 | B     |                   | A2SL9                      | A2FK10                         |
| AEI 022        | V1    | 53       | V            | 645           | 2887          | 1441990      | 40  | M   | A02/A32 | B08/B35 | B     |                   | B8FL8 ND                   | A2SL9 ND                       |
| AEI 023        | V1    | 63       | V            | 360           | 710           | 143747       | 33  | M   | A01/A02 | B08/B50 | B     |                   | B8FL8 FLKEKGGL             | A2SL9 ND                       |
| AEI 027        | L     | 67       | V            | 620           | 1600          | 38102        | NA  | NA  | NA      | NA      | NA    |                   | B8FL8 FLKEKGGL             | A2SL9 ND                       |
| AEI 036        | V1    | 59       | V            | 560           | 520           | 6163         | 51  | M   | A02/A11 | B14/B27 | B     | A2NV9             |                            | A2SL9 ND                       |
| AEI 038        | V1    | 46       | V            | 620           | 690           | 92407        | 22  | M   | A03/A24 | B35/B51 | B     |                   | A3RK9 RLRPGGKKK*           | A24RW8 ND                      |
| AEI 038        | V2    | 63       | V            | 920           | 800           | 66025        | 23  | M   | A03/A24 | B35/B51 | B     |                   | A3RK9                      | A3QK10 ND                      |
| AEI 039        | L     | 75       | V            | 730           | 1450          | 67190        | 48  | M   | A01/A23 | B49/B58 | B     |                   | A23RF10 RYPLTFGWCF         |                                |
| AEI 040        | V1    | 58       | V            | 500           | 960           | 18901        | 38  | M   | A02/A29 | B40/B51 | B     |                   | A2FK10 FLGKIWPSHK          | A2SL9 SLFNAVAVL                |
| AEI 041        | V1    | 49       | V            | 560           | 1100          | 75323        | 32  | M   | A02/A02 | B07/B08 | B     | A2NV9             | B8FL8 FLREKGGGL            | B7TL10 TPGPGTRYPL              |
| AEI 041        | L1    | 58       | V            | 475           | 640           | 56838        | 32  | M   | A02/A02 | B07/B08 | B     | A2NV9             | B8FL8                      | A2SL9 SLYNTVAVL                |
| AEI 049        | V1    | 32       | IV           | 250           | 3870          | 22521600     | 29  | M   | A01/A02 | B08/B51 | B     | A2NV9             | A2FK10 FLGKIWPSHK          | A2SL9 SLFNAVAVL                |
| AEI 049        | V2    | 53       | V            | 310           | 5390          | 1198340      | 29  | M   | A01/A02 | B08/B51 | B     | A2NV9             | A2FK10                     | A2SL9 ND                       |
| AEI 063        | L     | 78       | V            | 569           | 580           | 41145        | 56  | M   | A01/A02 | B08/B15 | B     |                   | B8FL8 FLKEKGGL             | B8GI9 GEIYKRWII                |
| AEI 072        | L     | 71       | V            | 340           | 560           | 76626        | NA  | NA  | NA      | NA      | NA    |                   | A23RF10 RYPLCFGW           | A2SL9 ND                       |
| AEI 313        | V1    | 44       | V            | 434           | 1281          | 2082323      | 56  | M   | A01/A02 | B37/B50 | B     |                   | A2FK10 ND                  | A2SL9 ND                       |
| AEI 333        | V1    | 50       | V            | 586           | 2149          | 324829       | 40  | M   | A02/A03 | B14/B51 | B     | A2NV9             | A3RK9 RLRPGGKKK*           | A2SL9 SLFNAVAVL                |
| AEI 333        | V2    | 61       | V            | 374           | 1834          | 604410       | 40  | M   | A02/A03 | B14/B51 | B     | A2NV9             | A3RK9                      | A2FK10 ND                      |
| AEI 341        | L     | 54       | V            | 348           | 242           | 53703        | 57  | M   | A11/A24 | B15/B35 | AE    |                   | A24RW8 RYPLTFGW            |                                |
| AEI 342        | V1    | 50       | V            | 362           | 1034          | 324829       | 45  | M   | A01/A33 | B08/B14 | B     |                   | B8GI9 GEIYKRWII            | B8FL8 FLKEKGGL                 |
| AEI 352        | V1    | 65       | V            | 672           | 529           | 12639        | 23  | M   | A02/A03 | B18/B51 | B     | A2NV9             | A3RK9 ND                   | A2SL9 ND                       |
| AEI 365        | V1    | 45       | V            | 257           | 1007          | 3917615      | 43  | M   | A02/A29 | B18/B44 | B     | A2NV9             | A2FK10 ND                  | A2SL9 ND                       |
| AEI 1868       | V1    | 51       | V            | 320           | 1140          | 284415       | 38  | M   | A02/A02 | B08/B13 | B     | A2NV9             | B8FL8 ND                   | A2SL9 ND                       |
| AEI 1868       | V2    | 64       | V            | 350           | 1290          | 224972       | 38  | M   | A02/A02 | B08/B13 | B     | A2NV9             | B8FL8                      |                                |
| AEI 03001      | V1    | 62       | V            | 350           | 1458          | 45142        | 42  | M   | A2/A66  | B14/B56 | B     | A2NV9             | A2FK10 ND                  | A2SL9 ND                       |
| AEI 03002      | V1    | 48       | V            | 540           | 1810          | 523540       | 42  | M   | A03/A23 | B15/B44 | B     |                   | A3RK9 RLRPGGKKK*           | A23RF10 ND                     |
| AEI 003622     | V2    | 56       | V            | 640           | 1220          | 555484       | 49  | M   | A11/A23 | B07/B35 | B     | B7TM10            |                            | B7TL10 TPGPGIRYPL              |
| AEI 31511      | V1    | 45       | V            | 500           | 800           | 460370       | 43  | M   | A03/A32 | B35/B39 | B     |                   | A3RK9 RLRPGGKKK            | A23RF10 RYPLTFGW               |
| AEI 43692      | V1    | 60       | V            | 690           | 1450          | 2309770      | 45  | M   | NA      | NA      | B     |                   | B8FL8 FLREKGGGL            | B8GI9 GEIYKRWII                |
| AEI 70941      | V1    | 42       | V            | 340           | 2330          | 4385500      | 30  | M   | NA      | NA      | B     |                   | B8FL8 ND                   |                                |
| AEI 101005     | V1    | 34       | IV           | 497           | 995           | 38845        | 39  | M   | NA      | NA      | B     |                   | A3RK9 ND                   | A3QK10 ND                      |
| AEI 5242715    | V1    | 57       | V            | 331           | 1287          | 218813       | 18  | M   | A03/A11 | B08/B15 | B     |                   | B8FL8 FLKEKGGL             | A3RK9 ND                       |
| AEI DR01       | V2    | 35       | IV           | 690           | 1910          | 1131551      | 36  | M   | A29/A29 | B07/B44 | B     |                   | B7TL10 ND                  |                                |
| AEI DR03       | V1    | 66       | V            | ND            | ND            | 101238       | 42  | M   | A02/A02 | B18/B44 | B     | A2NV9             | A2FK10 ND                  | A2SL9 ND                       |

\* Epitope sequences obtained by clonal sequencing

**Supplementary Table 1: Subjects characteristics in acute/early HIV infection.** Number of days post-infection (INF days), Fiebig stage, peripheral blood CD4 and CD8 T cell counts, HIV plasma viral load, age, sex, HLA-A and-B haplotypes, virus clade, and CMV and HIV-specific CD8 T cell responses studied are depicted for each subject with their corresponding autologous sequence. The autologous sequences of the potential epitopes based on the HLA typing that were not detected by tetramer staining are also depicted. Epitope sequences highlighted in purple represent escape variants in a non-anchored residue, and epitope sequences highlighted in orange represent escape variants in an anchored residue. HIV specificities highlighted in pink were used for the gene expression analyses.

| Subject  | Number | Visit | CD4 counts/ul | CD8 counts/ul | Viral load copies/ml | Age | Sex     | HLA-A   | HLA-B | Clade        | CMV Specificities | Detected HIV Specificities                          | Non-Detected HIV Specificities       |
|----------|--------|-------|---------------|---------------|----------------------|-----|---------|---------|-------|--------------|-------------------|-----------------------------------------------------|--------------------------------------|
| CI 008   | L2     | 444   | 1546          | 30614         | 49                   | M   | A03/A26 | B08/B27 | B     |              |                   | A3RK9 RLRPGGKKK                                     | B8FL8 ND                             |
| CI 013   | V13    | 870   | 1260          | 3606          | 31                   | F   | A02/A32 | B18/B35 | B     | A2NV9        |                   | A2SL9 SLFNTVATL*                                    | A2FK10 ND                            |
| CI 021   | L      | 590   | 1115          | 97044         | 29                   | M   | A02/A30 | B44/B50 | B     | A2NV9        |                   | A2FK10 FLGKIWPSHK                                   | A2SL9 SLYNTVATL                      |
| CI 022   | V8     | 366   | 1080          | 786410        | 40                   | M   | A02/A32 | B08/B35 | B     |              |                   | B8FL8 ND                                            | A2SL9 ND A2FK10 ND                   |
| CI 025   | L2     | 332   | 266           | 275829        | 42                   | M   | A32/A34 | B08/B15 | B     |              |                   | B8FL8 FLKEKGGL                                      |                                      |
| CI 026   | L4     | 450   | 898           | 268417        | 38                   | M   | A03/A29 | B07/B44 | B     | B7TM10       |                   | A3RK9 RLRPGGKKK B7TL10 TPGPGVRYFL A3QK10 QVPLRPMTYK |                                      |
| CI 034   | V13    | 490   | 1200          | 61085         | 47                   | M   | A02/A02 | B08/B44 | B     |              |                   | A2FK10 ND B8FL8 ND                                  | A2SL9 ND                             |
| CI 037   | L2     | 870   | 1055          | 10019         | 49                   | M   | A03/A68 | B07/B14 | B     | A2NV9        |                   | A3RK9 RLRPGGKKR                                     | B7TL10 ND                            |
| CI 038   | V11    | 290   | 290           | 61414         | 23                   | M   | A03/A24 | B35/B51 | B     |              |                   | A3RK9 RLRPGGKKQ*                                    | A24RW8 ND                            |
| CI 038   | V13    | 250   | 320           | 29242         | 23                   | M   | A03/A24 | B35/B51 | B     |              |                   | A3RK9                                               |                                      |
| CI 039   | L      | 560   | 590           | 117221        | 49                   | M   | A01/A23 | B49/B58 | B     |              |                   | A23RF10 RYPLTFGWYCY                                 |                                      |
| CI 040   | L2     | 345   | 511           | 71910         | 39                   | M   | A02/A29 | B40/B51 | B     |              |                   | A2FK10 ND                                           | A2SL9 ND                             |
| CI 040   | V13    | 300   | 420           | 58596         | 39                   | M   | A02/A29 | B40/B51 | B     |              |                   | A2FK10                                              |                                      |
| CI 041   | L3     | 296   | 717           | 174776        | 33                   | M   | A02/A02 | B07/B08 | B     | A2NV9 B7TM10 |                   | B8FL8 FLKEKGGL* B8GI9 GEVYKKWII                     | B7TL10 TPGPGTRYPL A2SL9 ND A2FK10 ND |
| CI 041   | V13    | 410   | 800           | 71032         | 33                   | M   | A02/A02 | B07/B08 | B     | A2NV9 B7TM10 |                   | B8FL8 B8GI9                                         |                                      |
| CI 067   | L      | 657   | 544           | 19041         | NA                   | NA  | NA      | NA      | NA    | B7TM10       |                   |                                                     | B7TL10 TPGPGVRYPL                    |
| CI 325   | L      | 345   | 931           | 318611        | 43                   | M   | A25/A25 | B07/B39 | B     | B7TM10       |                   |                                                     | B7TL10 TPGPGTRYPL                    |
| CI 333   | V9     | 194   | 654           | 31116         | 41                   | M   | A02/A03 | B14/B51 | B     | A2NV9        |                   | A3RK9 RLRPGGKKN* A2FK10 ND                          | A2SL9 SLFNAVAVL                      |
| CI 352   | V12    | 275   | 460           | 47805         | 24                   | M   | A02/A03 | B18/B51 | B     | A2NV9        |                   | A3RK9 ND A2SL9 ND                                   | A2FK10 ND                            |
| CI 03002 | V7     | 640   | 1150          | 52071         | 42                   | M   | A03/A23 | B15/B44 | B     |              |                   | A3RK9 RLRPGGKKK* A23RF10 ND                         |                                      |
| CI 03006 | L      | 522   | 366           | 2021          | 22                   | M   | A03/A68 | B18/B57 | B     |              |                   | A3RK9 ND                                            |                                      |
| CI 03025 | L      | 540   | 880           | 21379         | 40                   | M   | A02/A29 | B27/B45 | B     | A2NV9        |                   |                                                     | A2SL9 SLYNTVAVL A2FK10 FLGKIWPSHK    |
| CI 42117 | L      | 704   | 1081          | 68412         | 40                   | M   | A02/A11 | B07/B08 | B     | A2NV9 B7TM10 |                   | B7TL10 ND B8FL8 ND A2FK10 ND                        | A2SL9 ND                             |
| CI 71748 | L2     | 506   | 948           | 2959          | 23                   | M   | A02/A32 | B15/B15 | B     | A2NV9        |                   | A2FK10 FLGKIWPSHK                                   | A2SL9 SLYNTVAVL                      |
| CI 194   | L      | 234   | 268           | 33113         | NA                   | M   | A02/A24 | B18/B44 | NA    | A2NV9        |                   | A2FK10 ND                                           | A2SL9 ND A24RW8 ND                   |
| CI 192   | L      | 368   | 1320          | 34363         | NA                   | M   | A23/A30 | B07/B15 | NA    | B7TM10       |                   | B7TL10 ND                                           | A23RF10 ND                           |

\* Epitope sequences obtained by clonal sequencing

**Supplementary Table 2: Subjects characteristics in chronic HIV infection.** Number of days post-infection (INF days), Fiebig stage, peripheral blood CD4 and CD8 T cell counts, HIV plasma viral load, age, sex, HLA-A and-B haplotypes, virus clade, and CMV and HIV-specific CD8 T cell responses studied are depicted for each subject with their corresponding autologous sequence. The autologous sequences of the potential epitopes based on the HLA typing that were not detected by tetramer staining are also depicted. Epitope sequences highlighted in purple represent escape variants in a non-anchored residue, and epitope sequences highlighted in orange represent escape variants in an anchored residue. HIV and CMV specificities highlighted in pink were used for the gene expression analyses.

**Supplementary Table 3: Comparison of clinical data means between the entire cohorts and the subgroup of donors selected for gene array analysis.** In the acute/early group selected for gene expression, the analyzed specificities were: 1 B7TL10, 2 B8FL8, 1 B8GI9, 1 A2FK10, 1 A3RK9, 1 A24RW8 and in the chronically infected group: 1 B7TL10, 2 B8FL8, 1 B8GI9, 2 A2FK10. The CMV specificities were analyzed in the same chronically infected individuals than the analyzed HIV specificities.

|                                     | Days Post Infection | CD4 Count/ul | CD8 Count/ul | Viral Load (copies/ml) |
|-------------------------------------|---------------------|--------------|--------------|------------------------|
| Primary infected cohort             | 53                  | 487          | 1554         | 1,224,791              |
| Selected AEI donors for gene arrays | 60                  | 380          | 1560         | 377,872                |
| Chronically infected cohort         | More than 6 months  | 455          | 795          | 105,696                |
| Selected CI donors for gene arrays  | More than 6 months  | 421          | 866          | 62,724                 |

**Supplementary Table 4: Complete list of the 10630 filtered probes used for gene expression analysis.**

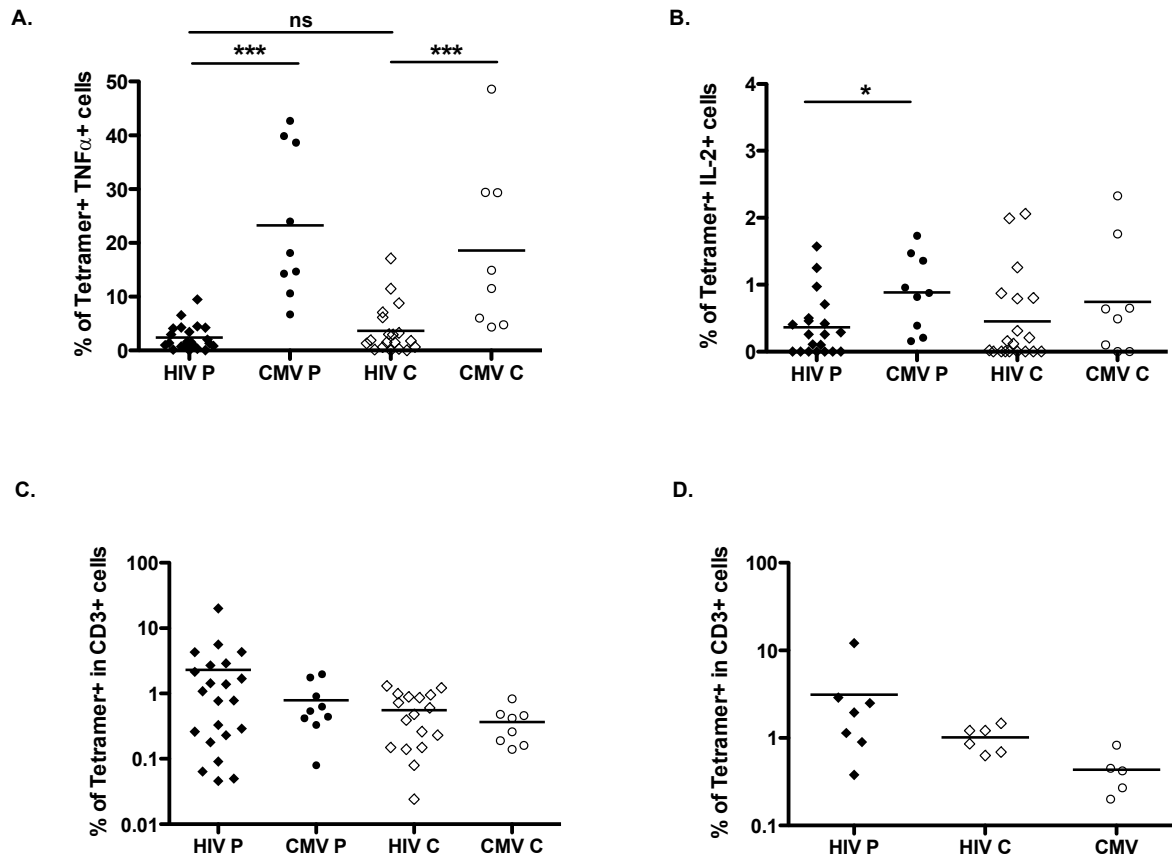

**Supplementary Figure 1: Secretion of TNF and IL-2 by HIV and CMV-specific CD8 T cells after antigenic stimulation in primary and chronic infection. A, B.** Percentage of cytokine secreting cells in tetramer+ cells for HIV (diamond) and CMV (circles) specific CD8 T cells in primary and chronic infection for TNF (A) and IL-2 (B). **C, D.** Percentage of HIV or CMV-specific CD8 T cells tetramers+ in primary and chronic infection in subjects analyzed for the functionality described Figure 5B and 5H: for the cytokine secretion (C) and the cytolytic capacity (D). No significant difference was observed between the percentage of HIV or CMV tetramers + in primary infection (HIV P or CMV P) and the percentage of HIV or CMV tetramers + in chronic infection (HIV C or CMV C).
